# Supplementary material
Source: HighWire-hosted journal article supplement (https://ard.bmj.com/content/79/2/268)

**A**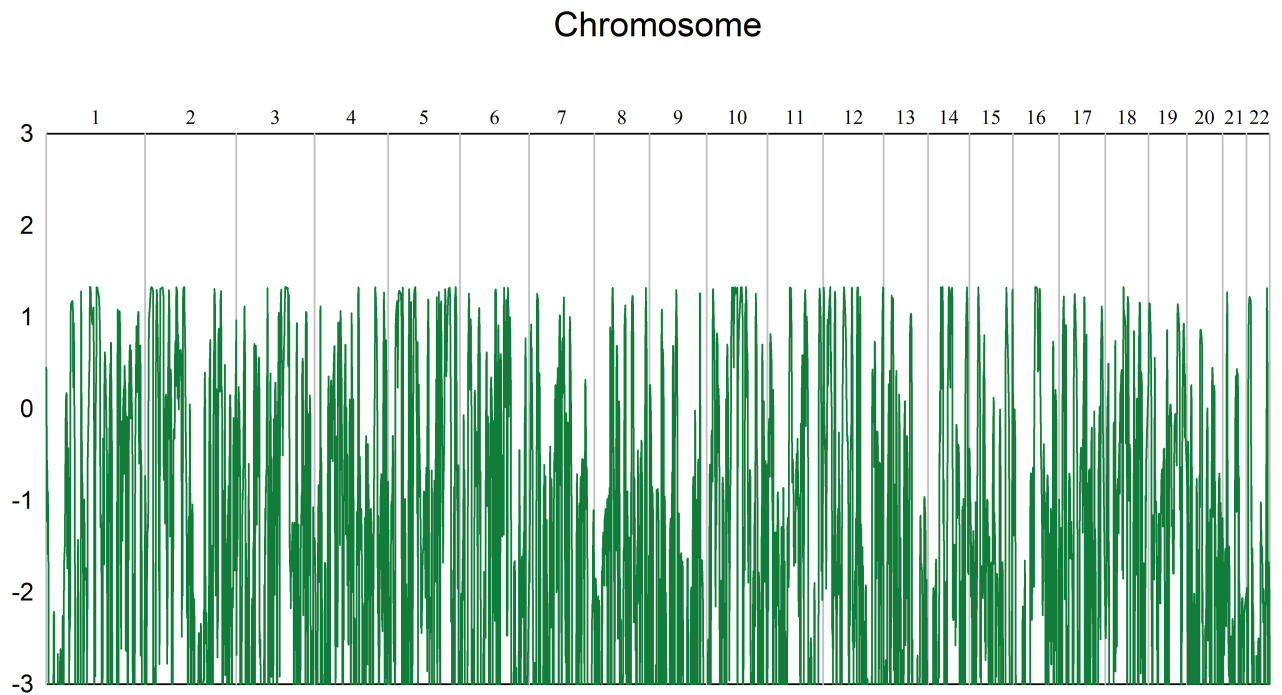**B**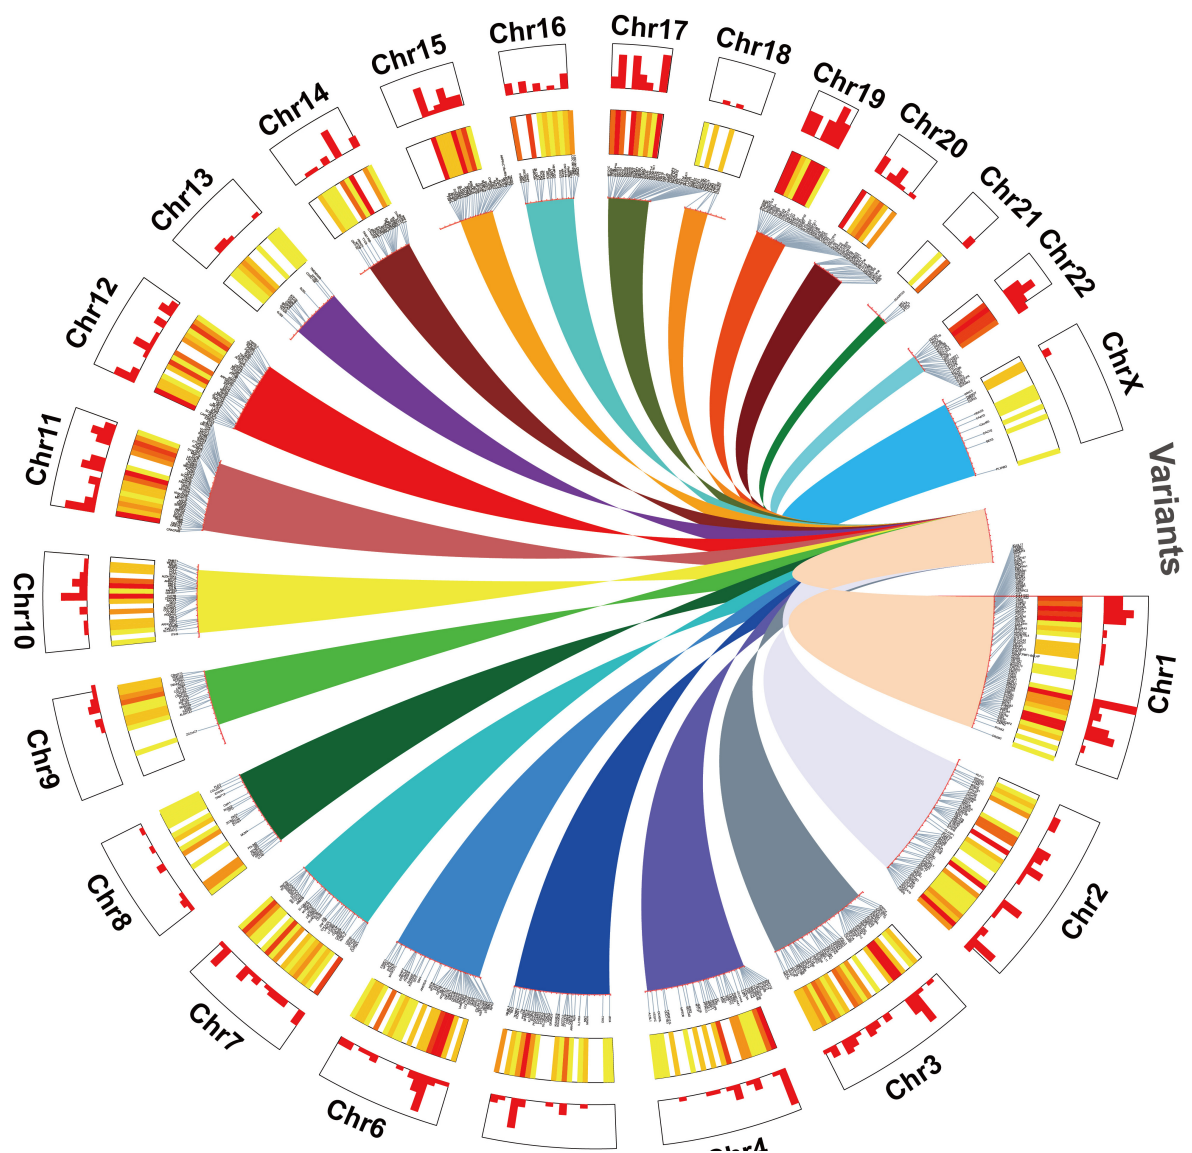

Supplement: inline-supplementary-material-4 [file inline-supplementary-material-4.pdf]

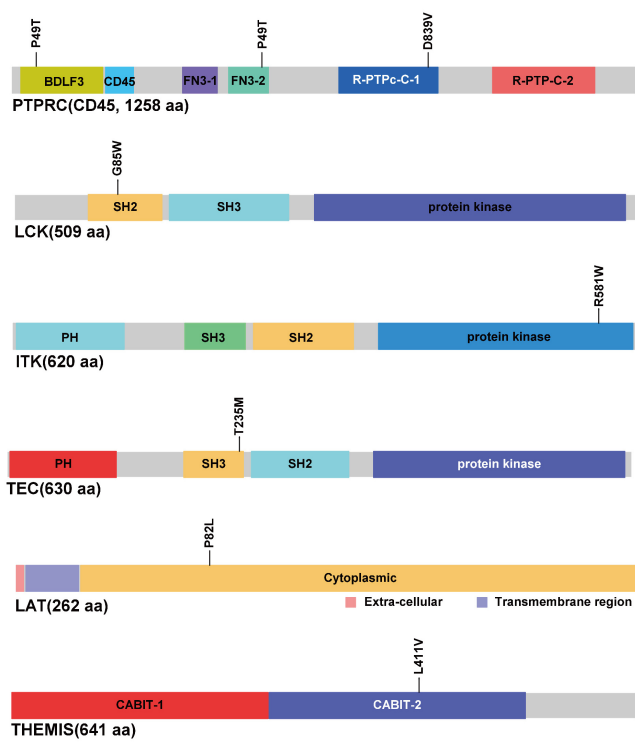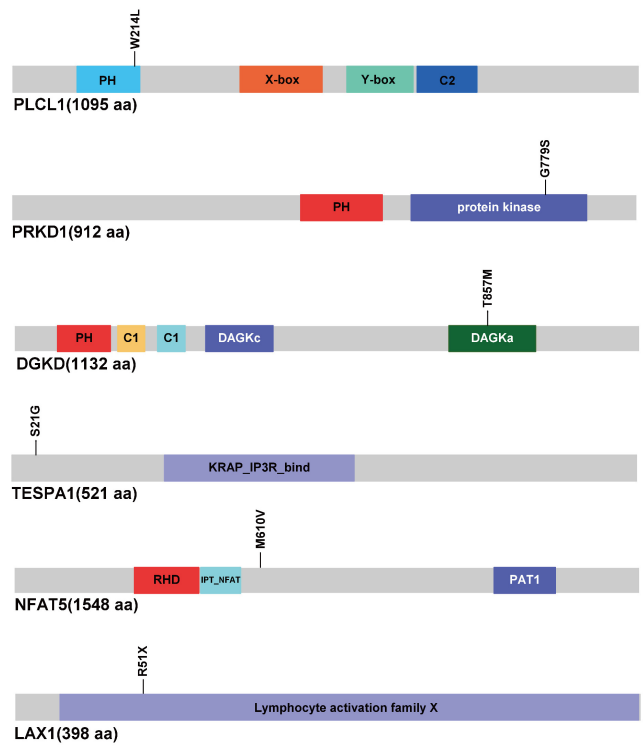

Supplement: inline-supplementary-material-7 [file inline-supplementary-material-7.pdf]

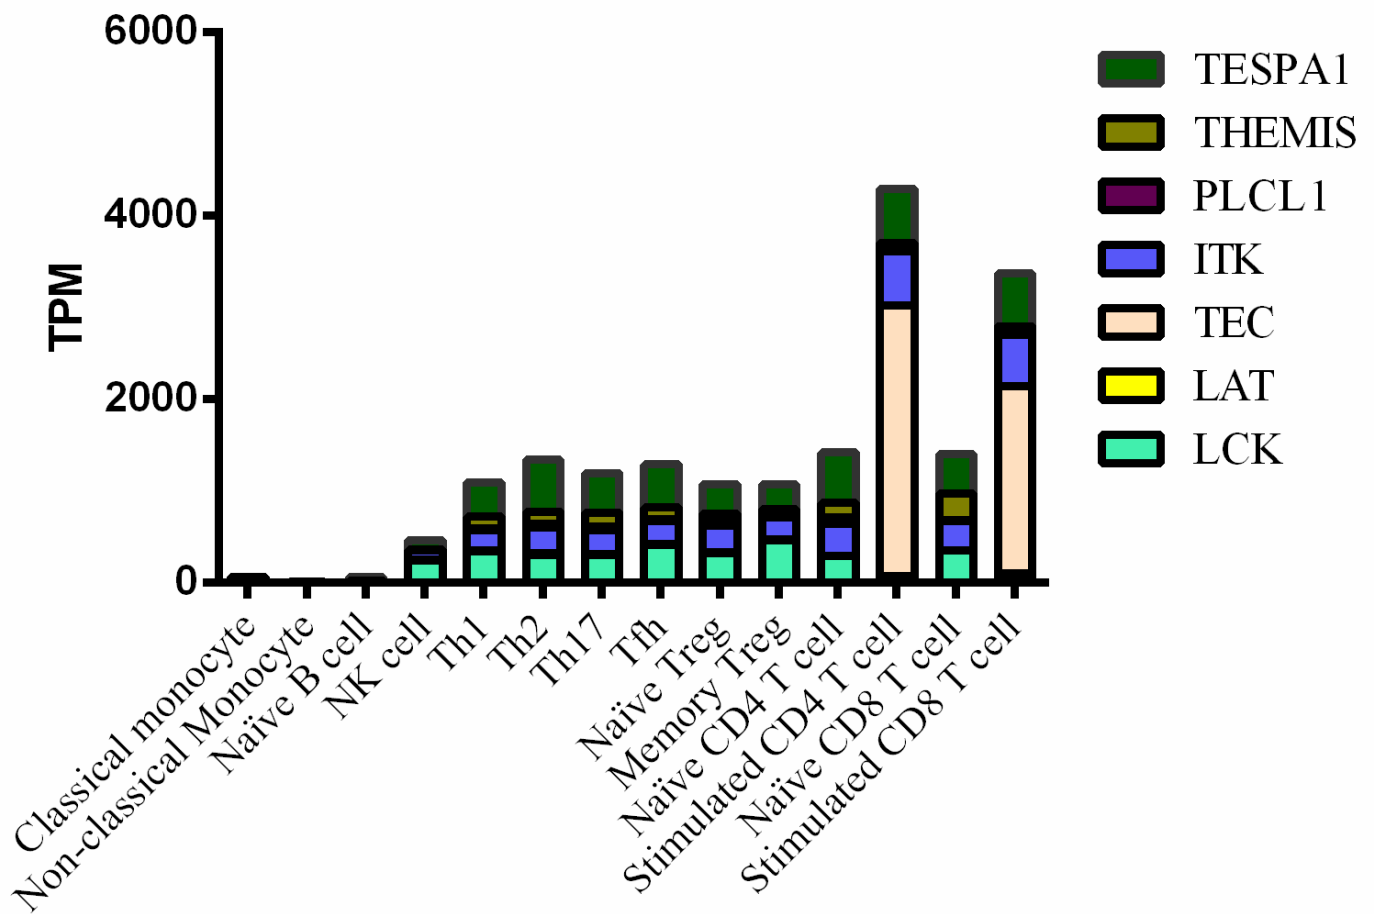

Supplement: inline-supplementary-material-8 [file inline-supplementary-material-8.pdf]

**A**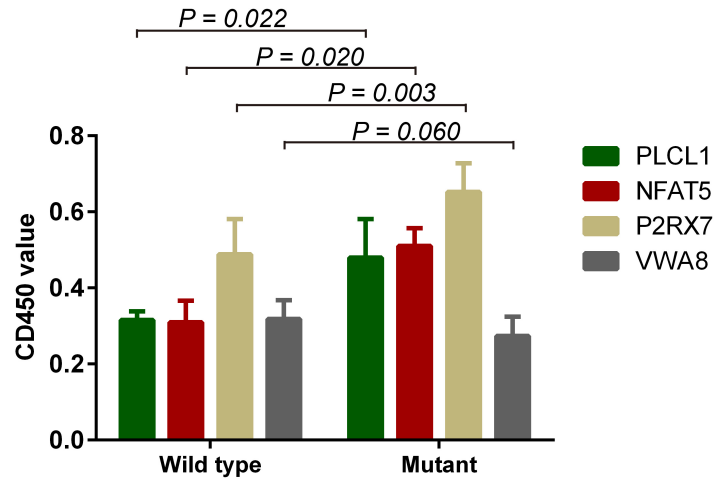**B**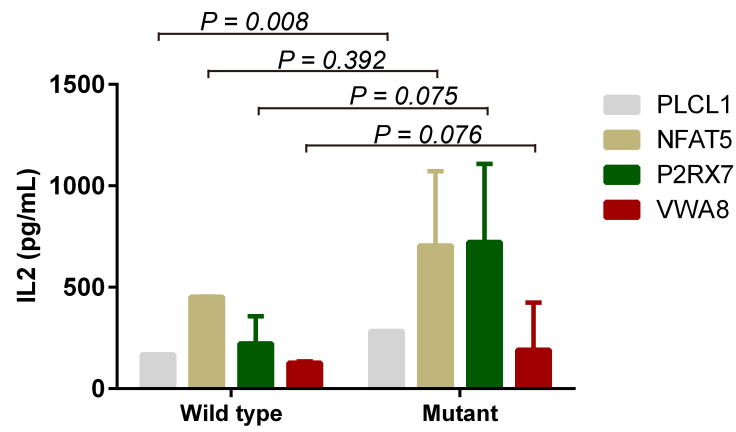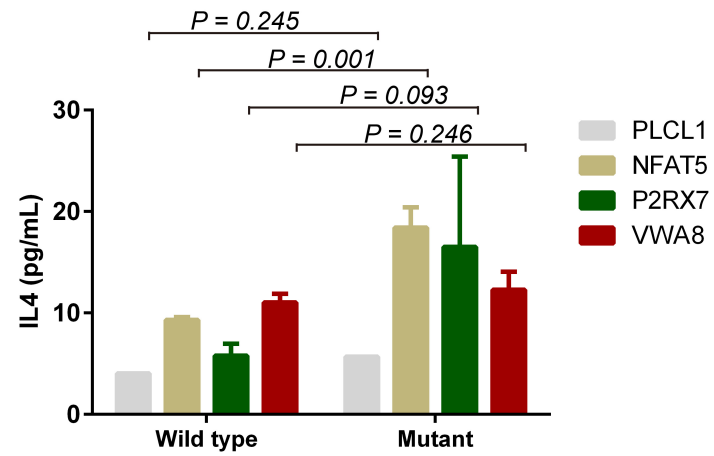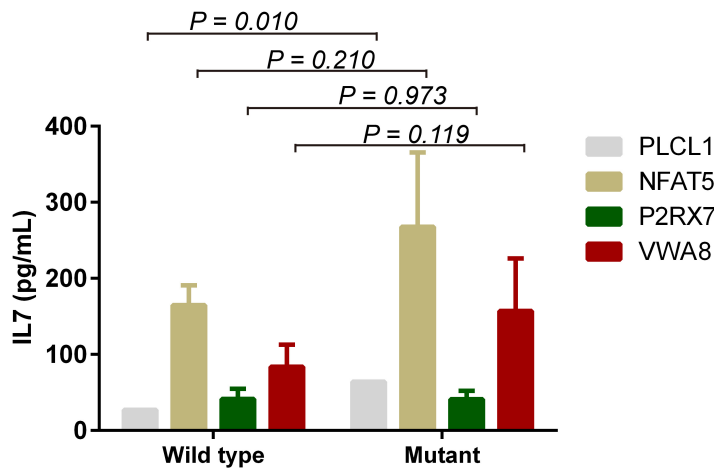

Supplement: inline-supplementary-material-9 [file inline-supplementary-material-9.pdf]
